# Supplementary material for: Why Ecological Footprint Calculators Should Move beyond Information Provision – An Empirical Study of the Relationship between Environmental Knowledge and Ecological Footprint
Source: Preprints.org preprint supplement (doi:10.20944/preprints202102.0578.v1), 2021-02-25
Supplement: Supplementary file 1 [file supplementary]

# Why ecological footprint calculators should move beyond information provision

# An empirical study of the relationship between environmental knowledge and ecological footprint

# Supplementary Materials

Table of Contents

[Survey Questions (Dutch) 3](#_Toc64907116)

[Gender 3](#_Toc64907117)

[Control Question 3](#_Toc64907118)

[Environmental Values 3](#_Toc64907119)

[Environmental Knowledge 5](#_Toc64907120)

[Ecological Footprint Calculator Outcome 7](#_Toc64907121)

[Income – Open 9](#_Toc64907122)

[Income – Bracketed 9](#_Toc64907123)

[Age 10](#_Toc64907124)

[Level of Education 10](#_Toc64907125)

[Comments 11](#_Toc64907126)

[Survey Questions (English) 12](#_Toc64907127)

[Gender 12](#_Toc64907128)

[Control Question 12](#_Toc64907129)

[Environmental Values 12](#_Toc64907130)

[Environmental Knowledge 14](#_Toc64907131)

[Ecological Footprint Calculator Outcome 15](#_Toc64907132)

[Income – Open 18](#_Toc64907133)

[Income – Bracketed 18](#_Toc64907134)

[Age 19](#_Toc64907135)

[Level of Education 19](#_Toc64907136)

[Comments 19](#_Toc64907137)

[Recruitment Details, Data Preparation, and Outliers 20](#_Toc64907138)

[Recruitment Details 20](#_Toc64907139)

[Data Preparation 20](#_Toc64907140)

[Incomplete Responses 20](#_Toc64907141)

[Withdrawn Permission 21](#_Toc64907142)

[Suspicious Ecological Footprint Results 21](#_Toc64907143)

[Outliers 23](#_Toc64907144)

[Ecological Footprint Calculator Questions (Dutch) 25](#_Toc64907145)

[Voeding (Food) 25](#_Toc64907146)

[Vakantie (Holidays) 29](#_Toc64907147)

[Vervoer (Transport) 31](#_Toc64907148)

[Kleding (Clothing) 33](#_Toc64907149)

[Woning (Housing) 35](#_Toc64907150)

[Elektriciteit en Verwarming (Electricity and Heating) 37](#_Toc64907151)

[Papier en Afval (Paper and Waste) 38](#_Toc64907152)

[Aankoop van Goederen (Purchase of Goods) 39](#_Toc64907153)

# Survey Questions (Dutch)

This appendix contains the measures used in this study. All questions are presented in the same order as they were presented to participants. Text that is not in italics was not part of the survey, but was added here for clarity. An English version of all survey items can be found in Appendix B.

## Gender

*Wat is uw geslacht?*

1. *Man*
2. *Vrouw*
3. *Anders / Zeg ik liever niet*

## Control Question

*Dit is een controlevraag. Selecteer ‘4’.*

1. *Minder dan 1*
2. *1*
3. *2*
4. *3*
5. *4*
6. *Meer dan 4*

## Environmental Values[[1]](#footnote-2)

*Hieronder beschrijven wij verschillende personen. Voor elke persoon beschrijven wij wat er erg belangrijk voor [hem/haar] is.* ***Wij willen u vragen elke beschrijving te lezen en aan te geven in welke mate deze persoon op u lijkt.*** *De betekenis van de scores is als volgt:*

***1*** *betekent dat de persoon helemaal niet op u lijkt; en*

***7*** *betekent dat de persoon heel erg veel op u lijkt.*

*Hoe hoger het cijfer, hoe meer de beschreven persoon op u lijkt.*

*Probeer zoveel mogelijk onderscheid te maken in uw antwoorden door zoveel mogelijk verschillende cijfers te gebruiken. De beschrijving van de persoon die het meest op u lijkt, zou dus het hoogste cijfer moeten krijgen. De beschrijving van de persoon die het minst op u lijkt, het laagste.*

Biospheric:

1. *Het is belangrijk voor [hem/haar] om het milieu te beschermen.*
2. *Het is belangrijk voor [hem/haar] om zich verbonden te voelen met het milieu.*
3. *Het is belangrijk voor [hem/haar] om respect te hebben voor de natuur.*
4. *Het is belangrijk voor [hem/haar] om milieuvervuiling te voorkomen.*

Altruistic:

1. *Het is belangrijk voor [hem/haar] dat iedereen dezelfde kansen krijgt.*
2. *Het is belangrijk voor [hem/haar] dat iedereen rechtvaardig behandeld wordt.*
3. *Het is belangrijk voor [hem/haar] om zorg te dragen voor mensen die minder goed af zijn.*
4. *Het is belangrijk voor [hem/haar] dat er geen oorlog en conflict is.*
5. *Het is belangrijk voor [hem/haar] om behulpzaam te zijn.*

Hedonic:

1. *Het is belangrijk voor [hem/haar] om plezier te hebben.*
2. *Het is belangrijk voor [hem/haar] om te genieten van de mooie dingen in het leven.*
3. *Het is belangrijk voor [hem/haar] om dingen te doen die [hij/zij] fijn vindt.*

Egoistic:

1. *Het is belangrijk voor [hem/haar] om invloedrijk te zijn.*
2. *Het is belangrijk voor [hem/haar] om controle te hebben over wat andere mensen doen.*
3. *Het is belangrijk voor [hem/haar] om gezag te hebben over anderen.*
4. *Het is belangrijk voor [hem/haar] hard te werken en ambitieus te zijn.*
5. *Het is belangrijk voor [hem/haar] om geld en bezittingen te hebben.*

Items were gender-matched to the gender of the participant. If a participant did not disclose a gender, male pronouns were used. Each item was rated on a 7-point scale (1 = *lijkt helemaal niet op mij*, 7 = *lijkt heel erg veel op mij*). The order of the items was randomized.

## Environmental Knowledge

*Hieronder volgen 18 stellingen over het milieu. Geef voor ieder van deze stellingen aan of u denkt dat de stelling waar of niet waar is. Het is belangrijk dat u geen informatie opzoekt op internet: we willen graag weten wat u zelf denkt! Als u het antwoord niet weet, kies dan 'Weet ik niet'.*

1. *Koolstofdioxide draagt bij aan het broeikaseffect.* (83.9%)
2. *Aardgas is een grotere bron van luchtvervuiling dan stookolie.** (49.5%)
3. *De opwarming van de aarde wordt veroorzaakt door het gat in de ozonlaag.** (44.4%)
4. *Het gat in de ozonlaag wordt veroorzaakt door een toename van de hoeveelheid koolstofdioxide in de lucht.** (24.6%)
5. *In veel gemeentes in Nederland wordt plastic afval ingezameld om gerecycled te worden.* (91.7%)
6. *Een frisdrankblikje doet er 200–500 jaar over om af te breken in de natuur.* (57.4%)
7. *Elektrische auto’s zullen een van de belangrijkste oplossingen zijn voor de afhankelijkheid van onze maatschappij van benzine, kolen, en gas.** (28.1%)
8. *Als ik autorijd, worden er stoffen uitgestoten die de ozonlaag aantasten.** (10.9%)
9. *Vanuit een ecologisch perspectief is het drinken van mineraalwater uit flessen beter dan het drinken van kraanwater.** (76.6%)
10. *Van A naar B over de snelweg rijden met 90 km/u is zuiniger en verbruikt minder benzine dan rijden met 110 km/u.* (84.2%)
11. *In Nederland kun je statiegeld krijgen voor het recyclen van een fles van 1,5 liter, maar niet voor frisdrankblikjes.* (94.4%)
12. *Vanuit een ecologisch perspectief is het hergebruiken van bijvoorbeeld flessen beter dan recyclen.* (76.6%)
13. *De hoeveelheid water die dagelijks gebruikt wordt met koken en drinken is groter dan de hoeveelheid water die dagelijks gebruikt wordt bij het doorspoelen van het toilet.** (67.6%)
14. *Het is beter voor het milieu om nieuwe wijken te bouwen dan om bestaande wijken dichter te bebouwen.** (36.2%)
15. *Een druppel grondwater kan later onderdeel worden van een wolk.* (81.9%)
16. *Sommige bestanddelen van steen kunnen in het verleden dieren geweest zijn.* (77.0%)
17. *Gassen die worden uitgestoten door een auto in China zouden overal ter wereld terecht kunnen komen.* (68.5%)
18. *De hoeveelheid water in de oceaan is in de loop der tijd toegenomen omdat er regenwater bij kwam.** (68.5%)

The items marked with * are false statements; other items are true statements. The percentage of participants who answered correctly is shown after each item. This scale is an adaptation of the scale created by Carmi et al. (2015). Carmi et al. (2015) provide all items in English; for this study, all items were translated to Dutch. Items 5, 11, and 14 were adapted to be applicable to The Netherlands. Items 7, 10, 12 and 13 were rephrased for clarity. The order of the items was randomized. Answer options were ‘Waar’ (‘True’), ‘Niet waar’ (‘False’), and ‘Weet ik niet’ (‘I don’t know’).

## Ecological Footprint Calculator Outcome

*Uw ecologische voetafdruk is de hoeveelheid land die jaarlijks nodig is voor uw leefgewoonten. Wij willen graag uw ecologische voetafdruk weten. Daarom willen we u vragen een voetafdruktest in te vullen. De voetafdruktest zal u een aantal vragen stellen over uw leefgewoonten. Het invullen van de voetafdruktest duurt 10 tot 15 minuten. Als u alle 56 vragen beantwoord heeft, zal de voetafdruktest uw ecologische voetafdruk laten zien. Lees de onderstaande instructies goed door voordat u begint aan de voetafdruktest.*

***Privacy***

*De voetafdruktest die u zal invullen is eigendom van De Natuur en Milieufederaties. Uw antwoorden op de vragen van de voetafdruktest en uw resultaten van de voetafdruktest worden anoniem verwerkt door De Natuur en Milieufederaties. Deze gegevens zullen geen persoonlijke informatie (zoals uw eigen e-mailadres of postcode) bevatten. Uw gegevens uit de voetafdruktest worden door De Natuur en Milieufederaties niet aan derden verstrekt. U kunt het privacybeleid van De Natuur en Milieufederaties vinden op* [*https://brabantsevoetafdruk.nl/privacy*](https://brabantsevoetafdruk.nl/privacy)*.*

***Instructies***

*Voordat de voetafdruktest begint zal u gevraagd worden om een gemeente, postcode, geslacht, leeftijd, en e-mailadres in te vullen.* ***Vul hier niet uw eigen gegevens in.*** *Vul in plaats daarvan fictieve gegevens in, bijvoorbeeld:*

- *Gemeente: Eindhoven*
- *Postcode: 5600MB*
- *Geslacht: Man*
- *Leeftijd: 30*
- *E-mailadres: voetafdruktest@gmail.com*

*De overige velden zijn niet verplicht; deze kunt u leeg laten.*

*Wanneer u klaar bent met de voetafdruktest, zal u uw resultaten te zien krijgen. Wij kunnen deze resultaten helaas niet zomaar bekijken. Daarom is het de bedoeling dat u uw resultaten van de voetafdruktest straks kopiëert naar deze vragenlijst.****Sluit de voetafdruktest dus niet direct af als u hem heeft afgerond. Keer eerst zelf terug naar deze vragenlijst (dit venster/tabblad van uw browser), om uw resultaten van de voetafdruktest hieronder in te vullen.***

*U kunt nu beginnen met de voetafdruktest. Klik op de volgende link om de voetafdruktest te beginnen: <https://brabantsevoetafdruk.nl/>. De link opent automatisch in een nieuw venster/tabblad. Deze vragenlijst blijft openstaan in het huidige venster/tabblad.*

*Wanneer u klaar bent met de voetafdruktest, zal u een resultatenpagina zien die er als volgt uitziet.*

*
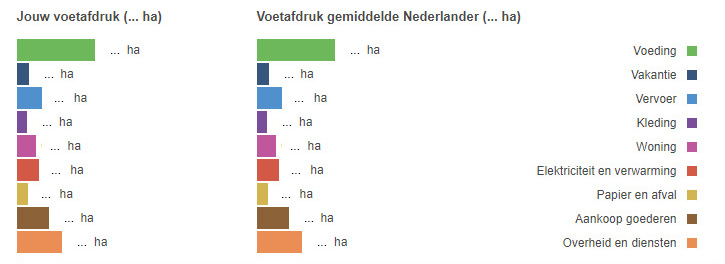
  Uw totale ecologische voetafdruk wordt gegeven in hectare (ha) en kunt u vinden bij de tekst “Jouw voetafdruk ( … ha)”. Uw ecologische voetafdruk per categorie wordt daaronder gegeven. (Op een mobiel apparaat staat de legenda van de categorieën onderaan.)*

*Kopieer eerst uw totale ecologische voetafdruk, en vul deze hieronder in.*

***Uw totale ecologische voetafdruk is*** *______ hectare (ha).*

*Kopieer nu uw ecologische voetafdruk per categorie, en vul deze hieronder in.*

***Uw ecologische voetafdruk per categorie is***

- *Voeding: ______ ha*
- *Vakantie: ______ ha*
- *Vervoer: ______ ha*
- *Kleding: ______ ha*
- *Woning: ______ ha*
- *Elektriciteit en verwarming: ______ ha*
- *Papier en afval: ______ ha*
- *Aankoop goederen: ______ ha*
- *Overheid en diensten: ______ ha*

The specific questions asked by the ecological footprint calculator are presented in Appendix D (in Dutch).

## Income – Open

*Deze vraag gaat over uw inkomen. We begrijpen het als u terughoudend bent over het delen van deze informatie. Wel is het heel belangrijk voor dit onderzoek dat wij uw inkomen weten, en het zou ons heel erg helpen als u deze vraag beantwoordt.*

***Wat is het (gemiddelde) maandelijkse netto inkomen van uw huishouden?****

*Als u deze vraag niet wil beantwoorden of het antwoord niet weet, laat het veld dan leeg.*

**Woont u in een studentenhuis of soortgelijke gedeelde woning? Vul dan uw eigen (gezins)inkomen in; tel het inkomen van huisgenoten alleen mee indien u samen financiële beslissingen neemt.*

## Income – Bracketed[[2]](#footnote-3)

*We begrijpen dat u uw precieze inkomen niet met ons wil of kunt delen. Toch hopen we dat u ons een indicatie kan geven van uw inkomen door de juiste categorie hieronder te selecteren. Het is echt belangrijk voor dit onderzoek dat wij uw inkomen weten, en het zou ons heel erg helpen als u deze vraag beantwoordt.*

***Wat is het (gemiddelde) maandelijkse netto inkomen van uw huishouden?****

**Woont u in een studentenhuis of soortgelijke gedeelde woning? Selecteer dan de categorie die past bij uw eigen (gezins)inkomen; tel het inkomen van huisgenoten alleen mee indien u samen financiële beslissingen neemt.*

1. *Minder dan 1.000 euro*
2. *1.000 tot 1.999 euro*
3. *2.000 tot 2.999 euro*
4. *3.000 tot 3.999 euro*
5. *4.000 tot 4.999 euro*
6. *5.000 tot 9.999 euro*
7. *10.000 tot 19.999 euro*
8. *20.000 euro of meer*
9. *Zeg ik liever niet*

## Age

***Wat is uw leeftijd?***

*Vul hier uw echte leeftijd in, niet de fictieve leeftijd die u bij de voetafdruktest heeft ingevuld.*

*______ jaar*

## Level of Education

*Wat is uw hoogst genoten afgeronde opleiding?*

1. *Basisonderwijs*
2. *Voortgezet onderwijs (vmbo, mavo, havo, vwo)*
3. *Middelbaar beroepsonderwijs (mbo)*
4. *Hoger beroepsonderwijs (hbo)*
5. *Universiteit (wo)*
6. *Doctoraat (PhD / PDEng)*
7. *Anders / Zeg ik liever niet*

## Comments

*Heeft u nog opmerkingen?*

# Survey Questions (English)

This appendix contains the English version of the measures used in this study (order is the same as in Appendix A). Note that the survey was conducted entirely in Dutch and that this appendix is provided only for clarity.

## Gender

*What is your gender?*

1. *Male*
2. *Female*
3. *Other / Prefer not to say*

## Control Question

*This is a control question. Select ‘4’.*

1. *Less than 1*
2. *1*
3. *2*
4. *3*
5. *4*
6. *More than 4*

## Environmental Values

*Below you will find brief descriptions of different people. For each person we describe what is very important* ***to [him/her]****. Please read each description carefully and* ***indicate how much this person is like you****. The meaning of the scores is as follows:*

***1*** *means that the persons is* ***totally not like you****,*

***7*** *means that the person is* ***totally like you****.*

*The higher the score, the more the person is like you.*

*Please try to* ***distinguish as much as possible*** *in your answering by using different scores. The person that is most like you should thus receive the highest score. The person that is the least like you, the lowest.*

Biospheric values

1. *It is important to [him/her] to protect the environment.*
2. *It is important to [him/her] to be in unity with nature.*
3. *It is important to [him/her] to respect nature.*
4. *It is important to [him/her] to prevent environmental pollution.*

Altruistic values

1. *It is important to [him/her] that every person has equal opportunities.*
2. *It is important to [him/her] that every person is treated justly.*
3. *It is important to [him/her] to take care of those who are worse off.*
4. *It is important to [him/her] that there is no war or conflict.*
5. *It is important to [him/her] to be helpful to others.*

Hedonic values

1. *It is important to [him/her] to have fun.*
2. *It is important to [him/her] to enjoy life’s pleasures.*
3. *It is important to [him/her] to do things [he/she] enjoys.*

Egoistic values

1. *It is important to [him/her] to be influential.*
2. *It is important to [him/her] to have control over others’ actions.*
3. *It is important to [him/her] to have authority over others.*
4. *It is important to [him/her] to work hard and be ambitious.*
5. *It is important to [him/her] to have money and possessions.*

Items were gender-matched to the gender of the participant. If a participant did not disclose a gender, male pronouns were used. Each item was rated on a 7-point scale (1 = *not like me at all*, 7 = *very much like me*). The order of the items was randomized.

## Environmental Knowledge

*Below, 18 statements about the environment are given. Indicate for each of these statements whether you think it is true or false. It is important that you do not look up information on the internet: we would like to know your own judgment. If you do not know the answer, select ‘I don’t know’.*

1. *Carbon dioxide contributes to the creation of the greenhouse effect.* (83.9%)
2. *Natural gas is a greater source of air pollution than fuel oil.**(49.6%)
3. *Global warming is caused by the hole in the ozone layer.**(44.4%)
4. *The hole in the ozone layer is caused by a rise in the amount of carbon dioxide in the air.**(24.6%)
5. *In many municipalities in The Netherlands, plastic waste is collected for recycling.* (91.7%)
6. *It takes a soft drink can 200–500 years to decompose in nature.* (57.4%)
7. *Electric cars will be one of the most important solutions to our society’s dependence on gasoline, coal, and gas.**(28.1%)
8. *When I drive a car, materials are emitted which destroy the ozone.** (10.9%)
9. *From an environmental standpoint, drinking mineral water from bottles is preferable to drinking water from the tap.**(76.6%)
10. *Driving from A to B on the highway at 90 kmh is more economical and uses less gasoline than driving at 110 kmh.* (84.2%)
11. *In The Netherlands, you may receive a refund for recycling a bottle of 1.5 liters, but not for soft drink cans.* (94.4%)
12. *From an environmental standpoint, reusing bottles, for example, is preferable to recycling.* (76.6%)
13. *The amount of water used daily during cooking and drinking is greater than the amount of water used daily for flushing the toilet.** (67.6%)
14. *It is environmentally preferable to build new neighborhoods rather than densifying existing ones.**(36.2%)
15. *A drop of ground water can become part of a cloud in the future.* (81.9%)
16. *Some of the components of rock may have been animals in the past.* (77.0%)
17. *Gases emitted from a car in China may reach anywhere in the world.* (68.5%)
18. *The quantity of water in the ocean has increased in time as a result of the addition of rain water.**(68.5%)

The items marked with * are false statements; other items are true statements. This scale is an adaptation of the scale created by Carmi et al. (2015). Carmi et al. (2015) provide all items in English; for this study, all items were translated to Dutch. Items 5, 11, and 14 were adapted to be applicable to The Netherlands. Items 7, 10, 12 and 13 were rephrased for clarity. The order of the items was randomized. Answer options were ‘True’, ‘False’, and ‘I don’t know’.

## Ecological Footprint Calculator Outcome

*Your ecological footprint is the total amount of land needed on a yearly basis to facilitate your lifestyle. We would like to know your ecological footprint. We want to ask you to fill out a footprint calculator. The footprint calculator will ask you several questions about your lifestyle. Filling out the calculator will take 10 to 15 minutes. When you have answered all 56 questions, the calculator will show you your ecological footprint. Please read the instructions carefully before you start the footprint calculator.*

***Privacy***

*The footprint calculator you will fill out is property of De Natuur en Milieufederaties. Your answers to the questions in the calculator and your calculator results are processed anonymously by De Natuur en Milieufederaties. These data will not contain personal information (such as you own e-mail address of zip code). De Natuur en Milieufederaties will not share your data from the calculator with third parties. You can find De Natuur en Milieufederaties’ privacy policy at* [*https://brabantsevoetafdruk.nl/privacy*](https://brabantsevoetafdruk.nl/privacy)*.*

***Instructions***

*Prior to starting the footprint calculator, you will be asked to enter a municipality, zip code, gender, age, and e-mail address.* ***Do not enter your own personal data.*** *Instead, enter fictitious data, for example:*

- *Municipality: Eindhoven*
- *Zip code: 5600MB*
- *Gender: Man*
- *Age: 30*
- *E-mail address: voetafdruktest@gmail.com*

*The other fields are not mandatory; you can leave these empty.*

*Once you have finished filling out the footprint calculator, you will be shown your results. Unfortunately, we do not have access to these results directly. That’s why we want to ask you to copy your calculator results to this survey.* ***Do not close the footprint calculator when you have finished filling it out. First, return to this survey (this window/tab of your browser), to enter your calculator results below.***

*You may now start the footprint calculator. Click the following link to begin:* [*https://brabantsevoetafdruk.nl*](https://brabantsevoetafdruk.nl)*. The link will automatically open in a new window/tab. This survey will remain open in the current window/tab.*

*Once you have finished filling out the footprint calculator, you will see a page of results that looks as follows.*


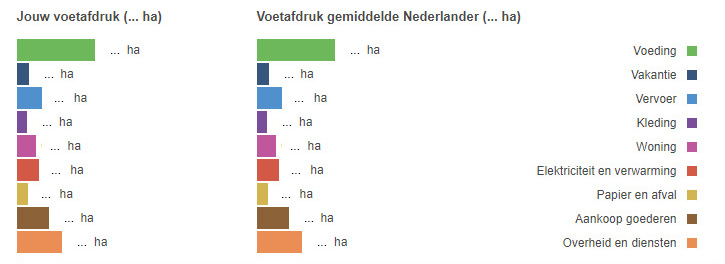


*Your total ecological footprint is given in hectares (ha) and can be found at the text “Jouw voetafdruk ( … ha)”. Your ecological footprint per category is given below. (On a mobile device, the legend for the categories can be seen at the bottom.)*

*First copy your total ecological footprint, and enter it below.*

***Your total ecological******footprint is*** *______ hectares (ha).*

*Now copy your ecological footprint per category, and enter these below.*

***Your ecological******footprint per category is***

- *Food: ______ ha*
- *Holidays: ______ ha*
- *Transport: ______ ha*
- *Clothing: ______ ha*
- *Housing: ______ ha*
- *Electricity and heating: ______ ha*
- *Paper and waste: ______ ha*
- *Purchase of goods: ______ ha*
- *Government and services: ______ ha*

The specific questions asked by the ecologicalfootprint calculator are presented in Appendix D (in Dutch).

## Income – Open

*This question concerns your income. We understand that you may be hesitant to share this information with us. However, knowing your income is very important to this study, and it would help us very much if you answer this question.*

***What is your household’s (average) net monthly income?****

*If you do not wish to answer this question or do not know the answer, please leave the box blank.*

**Do you live in student housing or a similar type of shared housing? Then, enter your own (family’s) income; only count the income of housemates if you make financial decisions together.*

## Income – Bracketed[[3]](#footnote-4)

*We understand that you do not wish, or are unable, to share your exact income with us. However, we hope that you are willing to give us an indication of your income by selecting the appropriate category below. Knowing your income is truly important to this study, and it will help us very much if you answer this question.*

***What is your household’s (average) net monthly income?****

**Do you live in student housing or a similar type of shared housing? Then, select the category that matches your own (family’s) income; only count the income of housemates if you make financial decisions together.*

1. *Less than 1,000 euros*
2. *1,000 to 1,999 euros*
3. *2,000 to 2,999 euros*
4. *3,000 to 3,999 euros*
5. *4,000 to 4,999 euros*
6. *5,000 to 9,999 euros*
7. *10,000 to 19,999 euros*
8. *20,000 euros or more*

## Age

***What is your age?***

*Enter your real age, not the fictitious age you entered into the footprint calculator.*

## Level of Education

*What is your highest completed level of education?*

1. *Primary education*
2. *Secondary education (vmbo, mavo, havo, vwo)*
3. *Secondary vocational education (mbo)*
4. *Higher professional education (hbo)*
5. *University education (wo)*
6. *Doctorate (PhD / PDEng)*
7. *Other / Prefer not to say*

Note that the answer options are based on the Dutch educational system.

## Comments

*Do you have any comments?*

# Recruitment Details, Data Preparation, and Outliers

## Recruitment Details

Initially, 396 complete survey responses were recruited through PanelClix, a Dutch research panel (<https://panelclix.nl/>). Of these, only around two-thirds remained after excluding participants who reported highly suspicious footprint calculator outcomes (for exclusion criteria, see the section Suspicious Ecological Footprint Results below). Because this would leave us with a sample much smaller than planned, new participants were recruited by the researchers via social media. In addition, the PanelClix survey was re-opened for an additional 122 complete responses. After collecting these 122 responses, data collection was stopped. By this time, 64 more complete responses had been collected via social media.

## Data Preparation

To prepare the data for analysis, we removed incomplete responses, participants who withdrew their permission to use their data upon completion of the survey (*n* = 12), participants who met the exclusion criteria for footprint calculator outcome as described below in the section Suspicious Ecological Footprint Results (*n* = 121), and one entry from a participant who indicated having completed the survey twice (*n* = 1). This resulted in a final sample of 448 participants.

### Incomplete Responses

First of all, participants who did not complete the survey were excluded from the analysis, for two reasons. First, footprint calculator results are necessary data for all hypothesis tests, and this was one of the last questions of the survey; participants who did not complete the whole survey, likely also did not complete the footprint calculator. Second, it cannot be ruled out that partial responses are responses from participants who quit the survey, and started it again later. For example, it was confirmed by PanelClix that there were at least two cases of participants who started the survey on a tablet device, dropped out, and started the survey from the beginning on a different device.

### Withdrawn Permission

Next, participants who withdrew their permission to use their data upon completion of the survey were excluded from the analysis (*n* = 12).

### Suspicious Ecological Footprint Results

Finally, participants who reported an extremely suspicious ecologicalfootprint calculator outcome were excluded from the analysis (*n* = 121). Exclusion criteria are listed below. It is important to note the following.

- The footprint calculator outcome could be at most 34.91 ha.
- The footprint in the category ‘government and services’ was the same for everyone, namely 1.12 ha.[[4]](#footnote-5)
- This means that next to the maximum of 34.91 ha, the total footprint also had a minimum of 1.12 ha.
- The average duration of the footprint calculator was 10–15 minutes. Participants spent additional time reading the instructions and entering their results in the survey.

With this in mind, the exclusion criteria were as follows.

Participants who filled out the total footprint, but did not fill out the footprint for the category ‘government and services’, were excluded if they met **at least one** of the following criteria.

- They spent less than 3 minutes on the footprint question (unfeasible).
- They reported a total footprint larger than 34.91 or smaller than 1.12 (impossible).

Participants who filled out both the total footprint and the footprint for the category ‘government and services’, were excluded if they met **at least two** of the following criteria.

- They spent less than 5 minutes on the question (unfeasible; here, 5 minutes are used as a cutoff instead of 3 minutes, to allow for filling out the categories).
- They reported a total footprint larger than 34.91 or smaller than 1.12 (impossible).
- They entered a value other than 1.12 for the category ‘government and services’ (incorrect).

Many participants met the exclusion criteria and were therefore excluded from the analysis (*n* = 109). This number was larger than expected. PanelClix stated that normally, their panel members are not asked to use external websites (such as the footprint calculator) in a survey. Because PanelClix cannot easily check whether or not their members have completed all questions on an external website, we believe that participants may have skipped the footprint calculator (and entered false values in the survey) in order to obtain their reward more quickly, assuming that PanelClix would not find out. However, the reward of all participants who were excluded based on the above criteria was ultimately revoked by PanelClix.

After applying these exclusion criteria, 11 participants remained who reported a total footprint larger than 34.91. All of these participants had entered 1.12 for the category ‘government and services’ and had also entered plausible values for the other categories. During the study, a small number of participants indicated that they had trouble using the input field for total footprint (the input box was too narrow on some devices or screen sizes). This could explain the errors in total footprint reported by these participants. Therefore, the total footprints of these participants were replaced by the sum of their footprints in each category. The same was done for one participant whose total footprint appeared to contain a typo (the total footprint matched the sum of the categories, except it was preceded by another digit).

Lastly, whole numbers were considered suspicious. Footprint calculator outcomes (both total footprint and footprint per category) were almost always numbers with two decimal places. A whole number in itself was not a reason for exclusion, but it was part of the criteria. Participants were excluded if they entered a whole number for the total footprint *and* entered only whole numbers and/or numbers with at most one decimal point for all categories (meaning they also failed to enter 1.12 for the category ‘government and services’) (*n* = 10). In addition, participants who entered a whole number for the total footprint, *and* did not fill out the categories, were excluded if they spent less than 5 minutes on the question (*n* = 2).

## Outliers

For net monthly household income, outliers were determined in two different ways: through manual inspection and through calculation.

First, incomes below € 1,000 and above € 20,000 were manually inspected. One data point was replaced to be missing because a monthly income of over € 500 million was reported, which was considered impossible (*n* = 1). Three other data points were recoded because of a suspected data entry error. These three participants had entered values below € 5, with a decimal point; exact incomes will not be reported in this paper, but let us use € 1.5 as an example. One of these participants clarified in a comment that his/her income was actually € 1,500 (using the example value). This had gone wrong because LimeSurvey interprets both periods and commas as decimal points. The same error was assumed for the other two participants, and the three data points were recoded accordingly (*n* = 3).

For monthly incomes below € 500 (*n* = 10), all but one were also below € 100. Because *household* income was asked, these extremely low incomes were considered highly suspicious (e.g., if a person lives with his/her parents and does not have a job, his/her own income may be (close to) zero, but the parents’ income should have been reported). Therefore, incomes below € 100 were marked as outliers (*n* = 9).

For high incomes, outliers were identified based on the upper outer fence. The upper outer fence is the upper quartile plus 3 IQRs (interquartile ranges), and was calculated to be € 11,400. This calculation was based on reported incomes both from the open question (*n* = 383) and from the bracketed (categorical) question (*n* = 42). To allow for the inclusion of bracket responses, all bracket responses were coded as continuous values by assuming the mean value of the bracket (e.g., responses in the bracket € 1,000 to € 2,000 were coded as € 1,500). The highest bracket (€ 20,000 or more) did not have an upper bound and was therefore coded as € 20,000. Reported incomes (both from the open question and from the bracketed question) exceeding the upper outer fence were marked as outliers (*n* = 26).[[5]](#footnote-6)

In summary, this resulted in one deletion, three recodings, 9 low-income outliers and 26 high-income outliers, for a total of 35 outliers out of 425 reported incomes (8.2%).

# Ecological Footprint Calculator Questions (Dutch)

The ecological footprint calculator used in this study was developed by the Dutch organization ‘De Natuur- en Milieufederaties’ for the province of Noord-Brabant. At the time of the study, the calculator was available online at <https://brabantsevoetafdruk.nl/>, and consisted of 56 questions in different categories. After a participant completed all questions for a category, their estimated footprint in that category was displayed along with the average Dutch footprint in that category. The total set of questions asked by the calculator are presented here (in order, per category) for posterity. Note that the calculator was developed by an external party, meaning that the exact methodology the calculator used to estimate participants’ ecological footprint is unknown to the researchers.

## Voeding (Food)

1. **Hoeveel liter zuivel gebruik je per week?** Zoals melk, karnemelk, yoghurt, roomijs en boter; geen kaas en sojaproducten
   1. Ik gebruik geen zuivel
   2. Minder dan 1 liter per week
   3. 1 tot 2 liter per week
   4. 2 tot 3 liter per week
   5. 3 tot 4 liter per week
   6. Meer dan 4 liter per week
2. **Hoeveel gram kaas en kaasproducten eet je per week?** Een sneetje kaas weegt rond de 30 gram
   1. Ik eet geen kaasproducten
   2. Minder dan 200 gram per week
   3. 200 tot 400 gram per week
   4. Meer dan 400 gram per week
3. **Hoeveel kilogram vlees en/of vis eet je per week, inclusief vleessnacks en vleeswaren?** Een plak ham weegt ongeveer 30 gram
   1. Ik eet geen vlees en vis
   2. Minder dan 200 gram per week
   3. 200 tot 500 gram per week
   4. 500 tot 1000 gram per week
   5. 1000 tot 2000 gram per week
   6. Meer dan 2000 gram per week
4. **Hoeveel glazen vruchtensap en/of frisdrank drink je per dag?** Water uit een fles niet meegeteld
   1. Ik drink nooit vruchtensap of frisdrank
   2. Af en toe eens een glas (minder dan 1 per dag)
   3. Rond de 10 glazen per week (1 à 2 glazen per dag)
   4. Meer dan 14 glazen per week (meer dan 2 glazen per dag)
5. **Hoeveel kopjes koffie drink je per dag?**
   1. Ik drink geen koffie
   2. Minder dan 14 kopjes per week (minder dan 2 kopjes per dag)
   3. 14 tot 35 kopjes per week (2 tot 5 kopjes per dag)
   4. Meer dan 35 kopjes per week (meer dan 5 kopjes per dag)
6. **Hoeveel glazen alcohol drink je per dag?**
   1. Ik drink geen alcohol
   2. Minder dan 7 glazen per week (max 1 glas per dag)
   3. Rond de 10 glazen per week (1 à 2 glazen per dag)
   4. Meer dan 14 glazen per week (meer dan 2 glazen per dag)
7. **Hoeveel versproducten die uit een verwarmde kas komen eet je in de winter per week?** Zoals tomaten, komkommers, aubergines, courgettes, paprikas, sla, aardbeien
   1. Geen
   2. Minder dan 3 stuks per week
   3. 3 tot 7 stuks per week
   4. Meer dan 7 stuks per week
8. **Hoe vaak per week eet je conserven, diepvriesproducten en kant-en-klaarmaaltijden?** Inclusief vlees en vis
   1. Ik eet geen conservenproducten en dergelijke
   2. Minder dan 2 keer per week
   3. 2 tot 4 keer per week
   4. Meer dan 4 keer per week
9. **Geef een schatting van de percentages voedsel die je eet volgens herkomst.** Eigen tuin, volkstuin of lokale verkoop
   1. Weet ik niet
   2. 0%
   3. 0 tot 20%
   4. 20 tot 50%
   5. 50 tot 80%
   6. 80 tot 100%
10. **Geef een schatting van de percentages voedsel die je eet volgens herkomst.** Regionaal (herkomst Nederland)
    1. Weet ik niet
    2. 0%
    3. 0 tot 20%
    4. 20 tot 50%
    5. 50 tot 80%
    6. 80 tot 100%
11. **Geef een schatting van de percentages voedsel die je eet volgens herkomst.** Import met het vliegtuig: Niet lang houdbare groenten en fruit van andere continenten, bv. asperges, boontjes, verse kruiden en zacht fruit zoals mango’s, ananas
    1. Weet ik niet
    2. 0%
    3. 0 tot 20%
    4. 20 tot 50%
    5. 50 tot 80%
    6. 80 tot 100%
12. **Geef een schatting van de percentages voedsel die je eet volgens herkomst.** Import per boot buiten Europa: Koffie, bananen, kiwi’s, exotische droge voeding zoals rijst
    1. Weet ik niet
    2. 0%
    3. 0 tot 20%
    4. 20 tot 50%
    5. 50 tot 80%
    6. 80 tot 100%
13. **Hoeveel eten gooi je weg?**
    1. Bijna niets
    2. Minder dan 5% van wat ik aankoop
    3. 5 tot 10% van wat ik aankoop
    4. 10 tot 20% van wat ik aankoop
    5. 20 tot 30% van wat ik aankoop
    6. Meer dan 30%

## Vakantie (Holidays)

1. **Ga je per vliegtuig op vakantie?** Binnen Europa
   1. Nooit
   2. Minder dan eens per vier jaar
   3. Ongeveer eens om de drie jaar
   4. Ongeveer eens om de twee jaar
   5. Eens per jaar
   6. Meerdere keren per jaar
2. **Ga je per vliegtuig op vakantie?** Buiten Europa
   1. Nooit
   2. Minder dan eens per vier jaar
   3. Ongeveer eens om de drie jaar
   4. Ongeveer eens om de twee jaar
   5. Eens per jaar
   6. Meerdere keren per jaar
3. **Ga je met de trein of de bus op vakantie?** Dichtbij (Nederland of buurland)
   1. Nooit
   2. Minder dan eens per vier jaar
   3. Ongeveer eens om de drie jaar
   4. Ongeveer eens om de twee jaar
   5. Eens per jaar
   6. Meerdere keren per jaar
4. **Ga je met de trein of de bus op vakantie?** Verder weg
   1. Nooit
   2. Minder dan eens per vier jaar
   3. Ongeveer eens om de drie jaar
   4. Ongeveer eens om de twee jaar
   5. Eens per jaar
   6. Meerdere keren per jaar
5. **Ga je met een auto op vakantie?** Dichtbij (Nederland of buurland)
   1. Nooit
   2. Minder dan eens per vier jaar
   3. Ongeveer eens om de drie jaar
   4. Ongeveer eens om de twee jaar
   5. Eens per jaar
   6. Meerdere keren per jaar
6. **Ga je met een auto op vakantie?** Verder weg (verder dan buurland van Nederland)
   1. Nooit
   2. Minder dan eens per vier jaar
   3. Ongeveer eens om de drie jaar
   4. Ongeveer eens om de twee jaar
   5. Eens per jaar
   6. Meerdere keren per jaar
7. **Als je met een auto op vakantie gaat, hoeveel mensen reizen dan gemiddeld met je mee?**
   1. Geen medereizigers / vraag niet van toepassing
   2. Eén medereiziger
   3. 2 à 3 medereizigers
   4. Meer dan 3 medereizigers
8. **Als je met een auto op vakantie gaat, hoe reis je dan meestal?**
   1. Geen extra's / vraag niet van toepassing
   2. Met fietsen in een rek
   3. Met dakkoffer of fietsen op het dak
   4. Met aanhangwagen
   5. Met camper of caravan

## Vervoer (Transport)

1. **Hoeveel kilometer leg je per jaar af voor privé- en woon-werkverkeer?** Met de auto; Tel ook het aantal kilometer dat je in een andere auto meerijdt
   1. 0 km
   2. Minder dan 1000 km
   3. Tussen 1000 en 2000 km
   4. Tussen 2000 en 6000 km
   5. Tussen 6000 en 12000 km
   6. Tussen 12000 en 20000 km
   7. Meer dan 20000 km
2. **Hoeveel kilometer leg je per jaar af voor privé- en woon-werkverkeer?** Met openbaar vervoer; trein, metro of bus
   1. 0 km
   2. Minder dan 1000 km
   3. Tussen 1000 en 2000 km
   4. Tussen 2000 en 6000 km
   5. Tussen 6000 en 12000 km
   6. Tussen 12000 en 20000 km
   7. Meer dan 20000 km
3. **Hoeveel kilometer leg je per jaar af voor privé- en woon-werkverkeer?** Met brommer, motor of scooter
   1. 0 km
   2. Minder dan 1000 km
   3. Tussen 1000 en 2000 km
   4. Tussen 2000 en 6000 km
   5. Tussen 6000 en 12000 km
   6. Tussen 12000 en 20000 km
   7. Meer dan 20000 km
4. **Op welke brandstof rijd je?** Als je meerdere gemotoriseerde voertuigen hebt, vul dan in voor het voertuig dat je het meest gebruikt.
   1. Niet van toepassing
   2. Groen gas uit de regio
   3. Elektriciteit
   4. Elektriciteit via eigen zonnepanelen
   5. Aardgas, LPG of hybride
   6. Benzine
   7. Diesel
5. **In wat voor type auto rijd je meestal?**
   1. Niet van toepassing
   2. Kleine stadsauto
   3. Ruime gezinsauto
   4. Terreinwagen
   5. Bestelbus
6. **Heb je airconditioning in de auto en heb je die vaak aan?**
   1. Niet van toepassing
   2. Nee, ik heb geen airco
   3. Ja, maar ik gebruik deze niet
   4. Ja, ik heb deze soms aan (enkele keren per jaar)
   5. Ja, deze heb ik vaak aan
7. **Wat is je rijstijl?**
   1. Niet van toepassing
   2. Ik rijd rustig en zuinig (ik ken de principes van ecodriving)
   3. Ik let niet op mijn rijstijl
   4. Ik rijd gehaast en sportief (snel optrekken en remmen,…)
8. **Hoe vaak zit je met andere mensen in de auto?**
   1. Niet van toepassing
   2. Bijna al mijn autoverplaatsingen
   3. Meer dan de helft van mijn verplaatsingen
   4. Af en toe
   5. Vrijwel nooit

## Kleding (Clothing)

1. **Hoeveel stuks kleding koop je per jaar?** Schoenparen
   1. Bijna geen
   2. Minder dan 2
   3. 2 tot 5
   4. 6 tot 15
   5. Meer dan 15
2. **Hoeveel stuks kleding koop je per jaar?** Jassen, lange rokken en broeken
   1. Bijna geen
   2. Minder dan 2
   3. 2 tot 5
   4. 6 tot 15
   5. Meer dan 15
3. **Hoeveel stuks kleding koop je per jaar?** Truien en jurken
   1. Bijna geen
   2. Minder dan 2
   3. 2 tot 5
   4. 6 tot 15
   5. Meer dan 15
4. **Hoeveel stuks kleding koop je per jaar?** Hemden, T-shirts, rokjes, ondergoed
   1. Bijna geen
   2. Minder dan 2
   3. 2 tot 5
   4. 6 tot 15
   5. Meer dan 15
5. **Wat voor kleding schaf je aan?**
   1. Ik koop alles nieuw
   2. Ik koop ongeveer de helft nieuw en de helft tweedehands
   3. Ik koop ongeveer een kwart nieuw en drie kwart tweedehands
   4. Ik koop vrijwel al mijn kleding tweedehands
6. **Geef de percentages van dierlijk en plantaardig vezeltype bij je kledingaanschaf, inclusief schoenen aan (je aandeel kunststoffen wordt automatisch berekend).** Leder, wol en bont
   1. Weet ik niet
   2. 0%
   3. 0 tot 10%
   4. 10 tot 25%
   5. 25 tot 50%
   6. 50 tot 75%
   7. 75 tot 100%
7. **Geef de percentages van dierlijk en plantaardig vezeltype bij je kledingaanschaf, inclusief schoenen aan (je aandeel kunststoffen wordt automatisch berekend).** Katoenvezel
   1. Weet ik niet
   2. 0%
   3. 0 tot 10%
   4. 10 tot 25%
   5. 25 tot 50%
   6. 50 tot 75%
   7. 75 tot 100%
8. **Wat doe je meestal met je oude kleding en textiel?**
   1. Grijze container
   2. Textielcontainer
   3. Huis-aan-huis inzameling
   4. Naar familie / vrienden / kennissen / tweedehandswinkel
   5. Ik maak er zelf nieuwe kleding van

## Woning (Housing)

1. **Uit hoeveel gezinsleden/bewoners bestaat je huishouden?** Inclusief jezelf
   1. 1
   2. 2
   3. 3
   4. 4
   5. 5
   6. 6
   7. Meer dan 6
2. **Wat is de grondoppervlakte van het perceel waarop je woont?** Inclusief tuin en verharde oppervlakte zoals parkeerruimte behorend bij de woning of het wooncomplex
   1. Weet ik niet
   2. Kleiner dan 200 m²
   3. 200 tot 500 m²
   4. 500 tot 1000 m²
   5. 1000 tot 2000 m²
   6. 2000 tot 3000 m²
   7. Groter dan 3000 m²
3. **Hoeveel huishoudens wonen er in je woning of wooncomplex?**
   1. Enkel mijn huishouden (ik heb een eengezinswoning)
   2. Twee gezinnen (bv. co-huising, twee onder één kap)
   3. Drie tot vijf huishoudens (bv. klein appartementsgebouw)
   4. Zes tot tien huishoudens
   5. Elf tot twintig huishoudens
   6. Meer dan twintig huishoudens (bv. groot appartementencomplex)
4. **Wat is de vloeroppervlakte van de binnenruimte voor jouw huishouden?** Alle etages, inclusief zolder, tellen mee
   1. Weet ik niet
   2. Minder dan 40 m² (bv. studio, klein appartement)
   3. 40 tot 70 m² (bv. gemiddeld appartement, klein rijtjeshuis)
   4. 70 tot 100 m² (bv. rijtjeshuis, groot appartement)
   5. 100 tot 300 m² (bv. groot rijtjeshuis, alleenstaande woning)
   6. 300 tot 500 m² (bv. villa)
   7. Meer dan 500 m² (bv. kasteel)

## Elektriciteit en Verwarming (Electricity and Heating)

1. **Hoeveel elektriciteit van het elektriciteitsnet gebruikt je huishouden per jaar?** Je vindt de exacte info over je verbruik op de jaarlijkse eindafrekening van de energieleverancier
   1. Niet van toepassing
   2. Weet ik niet
   3. Minder dan 1000 kWh
   4. 1000 tot 2000 kWh
   5. 2000 tot 3000 kWh
   6. 3000 tot 4000 kWh
   7. 4000 tot 6000 kWh
   8. Meer dan 6000 kWh
2. **Wat voor stroom van het elektriciteitsnet gebruik je in huis?**
   1. Niet van toepassing
   2. Weet ik niet
   3. groene/natuurstroom
   4. grijze stroom (kernenergie en fossiele brandstoffen)
3. **Hoeveel gas gebruikt je huishouden per jaar?** Je vindt de exacte info over je verbruik op de jaarlijkse eindafrekening van de energieleverancier
   1. Weet ik niet
   2. Geen
   3. Minder dan 500 m³
   4. 500 tot 1000 m³
   5. 1000 tot 1500 m³
   6. 1500 tot 2000 m³
   7. 2000 tot 3000 m³
   8. Meer dan 3000 m³
4. **Wat voor gas gebruik je in huis?**
   1. Niet van toepassing
   2. Ik weet het niet.
   3. Groen gas (biogas)
   4. Gewoon gas

## Papier en Afval (Paper and Waste)

1. **Hoeveel papier- en kartonafval van je huishouden wordt per maand apart (gescheiden) ingezameld?** Het papier bij het restafval telt hier niet mee
   1. Bijna niets
   2. Het volume van 1 tot 5 schoendozen
   3. Het volume van 5 tot 10 schoendozen
   4. Het volume van 10 tot 20 schoendozen
   5. Meer dan het volume van 20 schoendozen
2. **Hoeveel restafval (grijs afval) produceert je huishouden per week?**
   1. Bijna niets (minder dan een kleine afvalzak)
   2. Rond de 15 liter per week (bv. een kleine afvalzak)
   3. Rond de 30 liter per week (een paar kleine afvalzakken)
   4. Rond de 60 liter per week (een gewone afvalzak)
   5. Rond de 100 liter per week (een paar gewone afvalzakken)
   6. Meer dan 200 liter (meer dan 4 gewone afvalzakken)
3. **Scheid je recyclebaar afval?** Plastic en drankkartons
   1. Nee, dat doe ik niet / mijn gemeente doet niet aan gescheiden inzameling
   2. Een deel van het recycleerbare plastic en drankkartons wordt apart verzameld
   3. Bijna al het recycleerbare afval wordt apart verzameld
   4. Ik scheid alles
4. **Hoeveel glazen, potten en flessen gebruikt je huishouden per week?**
   1. Bijna geen
   2. Eén
   3. Een paar
   4. 3 tot 5
   5. Meer dan 5
5. **Hoeveel van je glasafval doe je in de glascontainer?**
   1. Niets
   2. Minder dan de helft
   3. Ongeveer de helft
   4. Meer dan de helft
   5. Alles

## Aankoop van Goederen (Purchase of Goods)

1. **Hoeveel nieuwe kleine elektrische apparaten kocht je huishouden het afgelopen jaar?** Scheerapparaat, koffiezetapparaat, elektrisch speelgoed, broodrooster, stofzuiger, ...
   1. Geen
   2. Bijna geen, of bijna altijd tweedehands
   3. 1 tot 2
   4. 2 tot 4
   5. 4 tot 7
   6. Meer dan 7
2. **Hoeveel nieuwe kleine elektronica/ICT/multimedia kocht je huishouden het afgelopen jaar?** Mp3, smartphone, tablet, mobiele telefoon, digitaal fototoestel, gps
   1. Geen
   2. Bijna geen, of bijna altijd tweedehands
   3. 1 tot 2
   4. 2 tot 4
   5. 4 tot 7
   6. Meer dan 7
3. **Hoeveel nieuwe grote meubelstukken kocht je huishouden het afgelopen jaar?** Kasten, banken, bedden, bureau’s, tafels
   1. Geen
   2. Bijna geen, of bijna altijd tweedehands
   3. 1 tot 2
   4. 2 tot 4
   5. 4 tot 7
   6. Meer dan 7
4. **Hoeveel nieuwe grote elektrische apparaten kocht je huishouden tijdens de afgelopen vijf jaar?** Wasmachine, koelkast, droogkast,...
   1. Geen
   2. Bijna geen, of bijna altijd tweedehands
   3. 1 tot 2
   4. 2 tot 4
   5. 4 tot 7
   6. Meer dan 7
5. **Hoeveel nieuwe grote elektronica/ICT/multimedia apparaten kocht je huishouden tijdens de afgelopen vijf jaar?** Laptop, desktop computer, printer, videoprojector, spelconsole, audio-visuele apparatuur
   1. Geen
   2. Bijna geen, of bijna altijd tweedehands
   3. 1 tot 2
   4. 2 tot 4
   5. 4 tot 7
   6. Meer dan 7
6. **Hoeveel nieuwe auto’s kocht je huishouden de afgelopen tien jaar?**
   1. Geen
   2. Bijna geen, of bijna altijd tweedehands
   3. 1 tot 2
   4. 2 tot 4
   5. 4 tot 7
   6. Meer dan 7

1. The E-PVQ (Bouman et al., 2018) is available both in Dutch and English. Both versions can be found online at <https://www.epgroningen.nl/epvq/>. [↑](#footnote-ref-2)
2. Note that this question was only asked if a participant did not answer the open question. Brackets were based on the income classes specified by the Dutch Centraal Bureau voor Statistiek (CBS, 2019). [↑](#footnote-ref-3)
3. Note that this question was only asked if a participant did not answer the open question. Brackets were based on the income classes specified by the Dutch Centraal Bureau voor Statistiek (CBS, 2019). [↑](#footnote-ref-4)
4. This was updated on the footprint calculator website between the time of data collection and the time of writing. At the time of writing, the footprint in the category ‘government and services’ is listed as 0.56 ha. [↑](#footnote-ref-5)
5. Only three reported incomes exceeded the upper inner fence (upper quartile plus 1.5 IQRs; € 7,800) but not the upper outer fence; these mild outliers were assumed to be correct, and were not treated as outliers. [↑](#footnote-ref-6)
